# Supplementary material for: Effect of Dispersion Solvent on the Deposition of PVP-Silver Nanoparticles onto DBD Plasma-Treated Polyamide 6,6 Fabric and Its Antimicrobial Efficiency
Source: MDPI journal article supplement (doi:10.3390/nano10040607), 2020-03-26
Supplement: s1 [file s1]

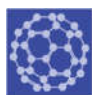

## Supplementary Material

# Effect of dispersion solvent on the deposition of PVP-silver nanoparticles onto DBD plasma-treated Polyamide 6,6 fabric and its antimicrobial efficiency

Ana I Ribeiro<sup>1</sup>, Martina Modic<sup>2</sup>, Uros Cvelbar<sup>2</sup>, Gheorghe Dinescu<sup>3</sup>, Bogdana Mitu<sup>3</sup>, Anton Nikiforov<sup>4</sup>, Christophe Leys<sup>4</sup>, Irina Kuchakova<sup>4</sup>, Mike De Vrieze<sup>5</sup>, Helena P. Felgueiras<sup>1</sup>, António P Souto<sup>1</sup> and Andrea Zille<sup>1\*</sup>

<sup>1</sup>2C2T - Centro de Ciência e Tecnologia Têxtil, Universidade do Minho, Campus de Azurém, 4800-058 Guimarães, Portugal; azille@2c2t.uminho.pt

<sup>2</sup>Jožef Stefan Institute, Ljubljana, Slovenia; uros.cvelbar@guest.arnes.si

<sup>3</sup>National Institute for Lasers, Plasma and Radiation Physics, Măgurele, Romania; mitub@infim.ro

<sup>4</sup>Department of Applied Physics, Ghent University, Ghent, Belgium; anton.nikiforov@ugent.be

<sup>5</sup>Centexbel Ghent, Technologie park 7, 9052, Ghent, Belgium; mike.devrieze@centexbel.be

\*Corresponding Author: Andrea Zille, E-mail: azille@2c2t.uminho.pt

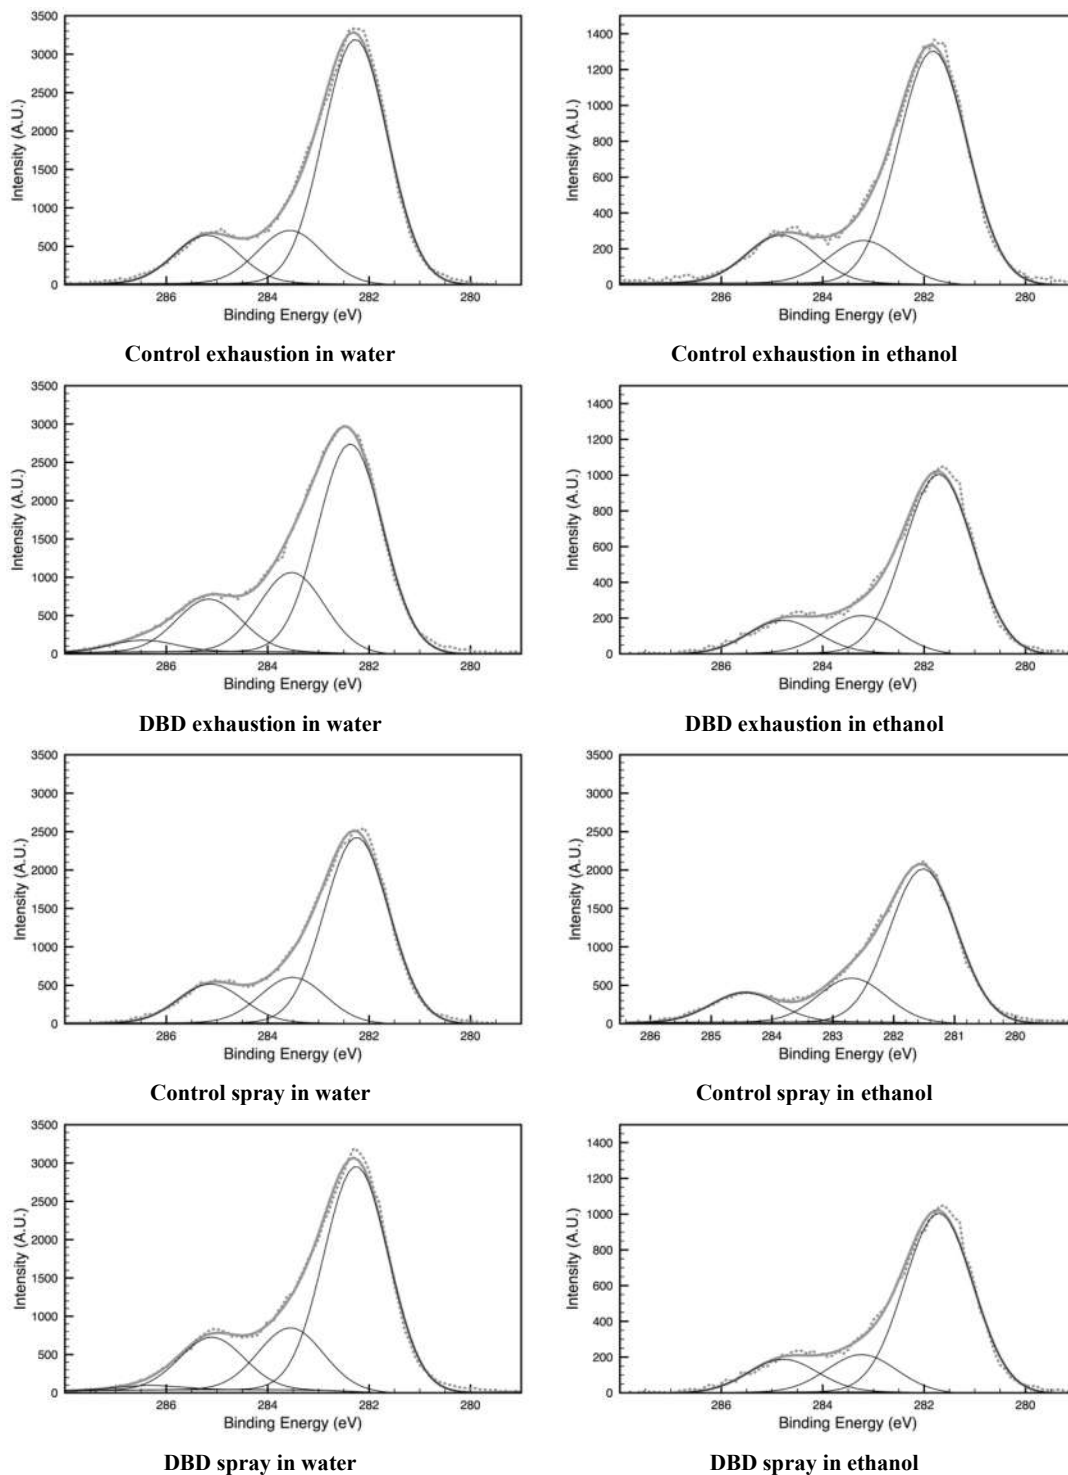

**Figure S1.** - High-resolution deconvoluted XPS spectra of the C1s binding energy region of untreated and DBD plasma-treated PA66 samples with PVP-AgNPs in water (W) and ethanol (E) dispersions deposited by spray (Sp) and exhaustion (Ex) methods.

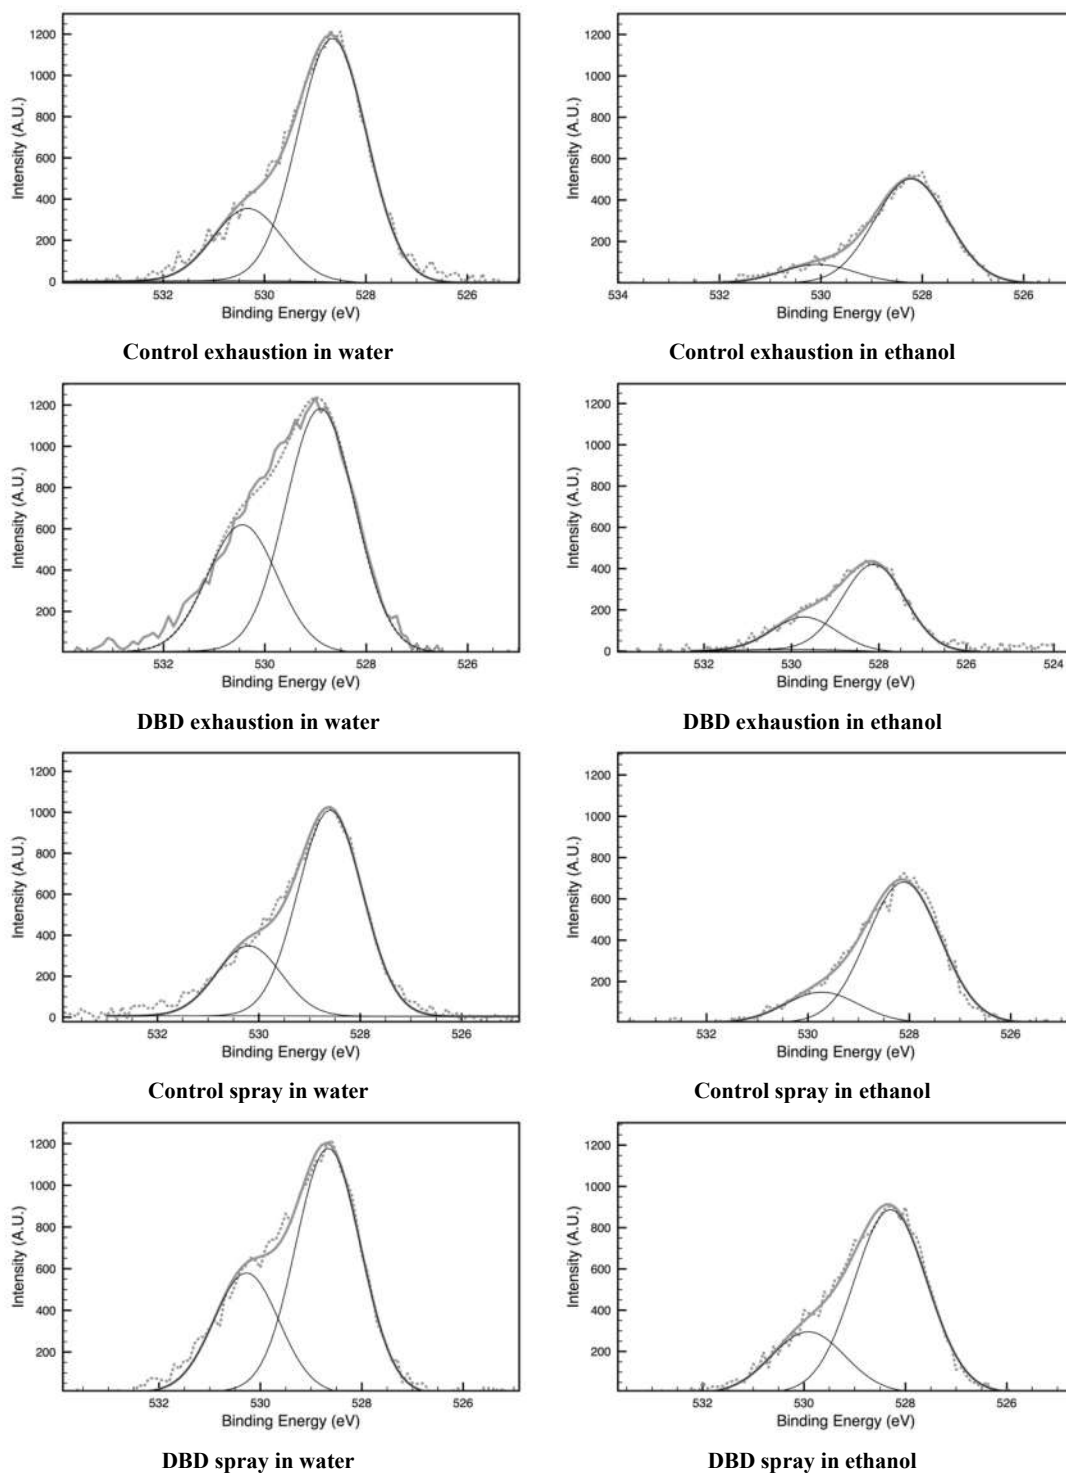

**Figure S2.** - High-resolution deconvoluted XPS spectra of the O1s binding energy region of untreated and DBD plasma-treated PA66 samples with PVP-AgNPs in water (W) and ethanol (E) dispersions deposited by spray (Sp) and exhaustion (Ex) methods.

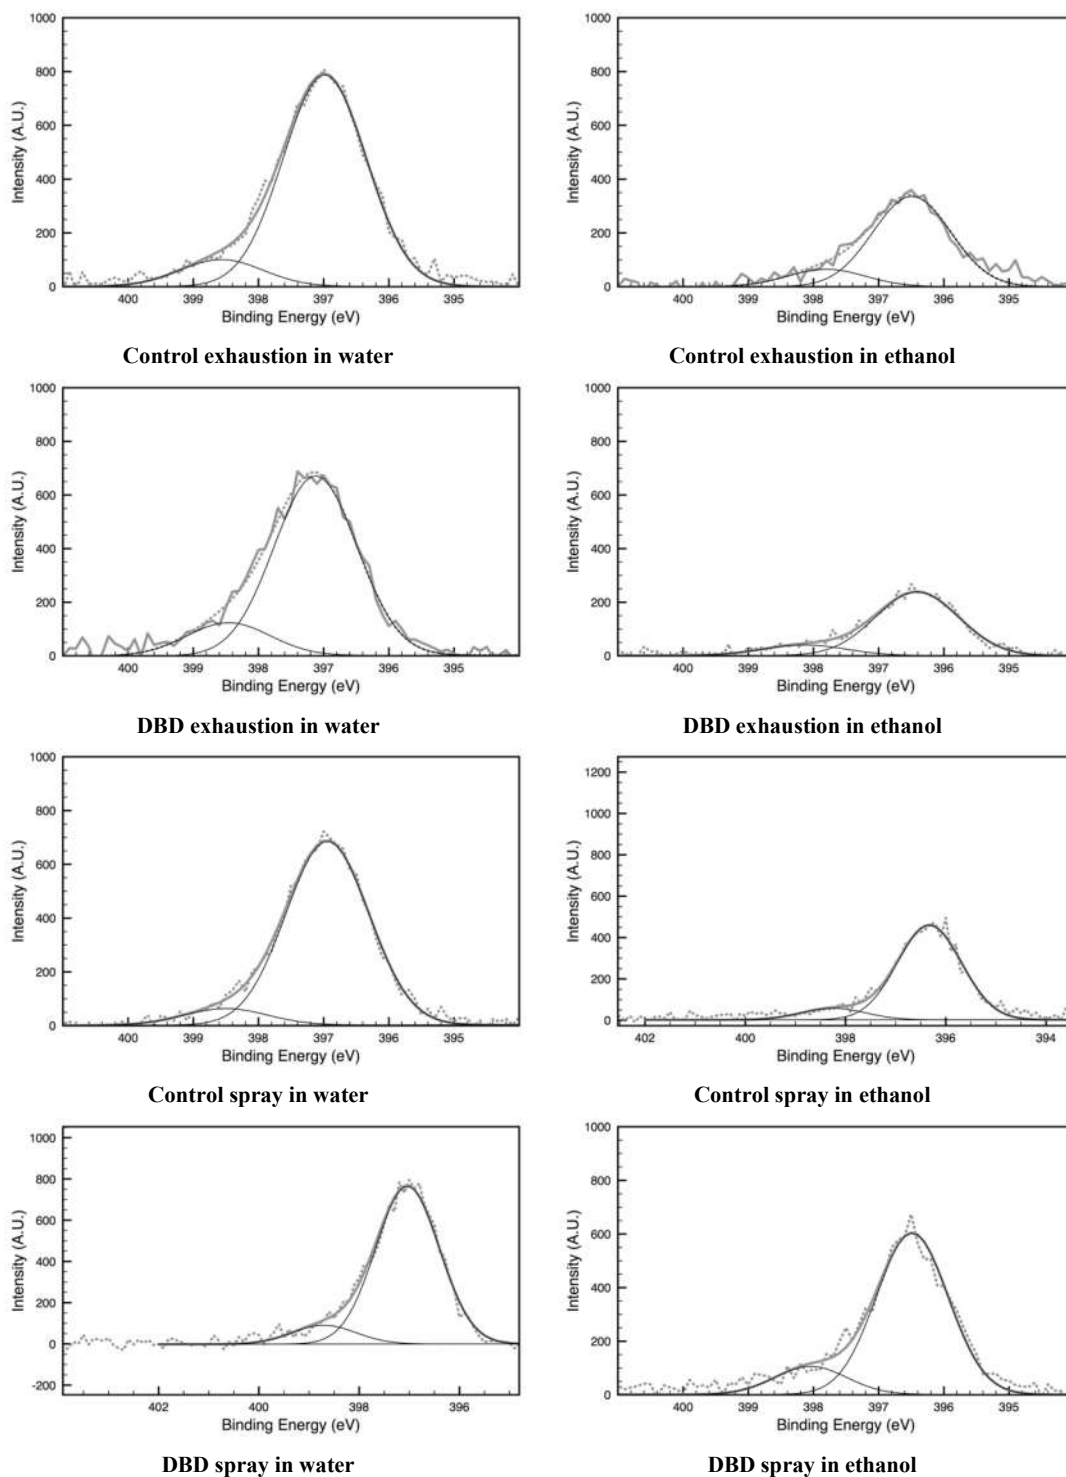

**Figure S3.** - High-resolution deconvoluted XPS spectra of the N1s binding energy region of untreated and DBD plasma-treated PA66 samples with PVP-AgNPs in water (W) and ethanol (E) dispersions deposited by spray (Sp) and exhaustion (Ex) methods.

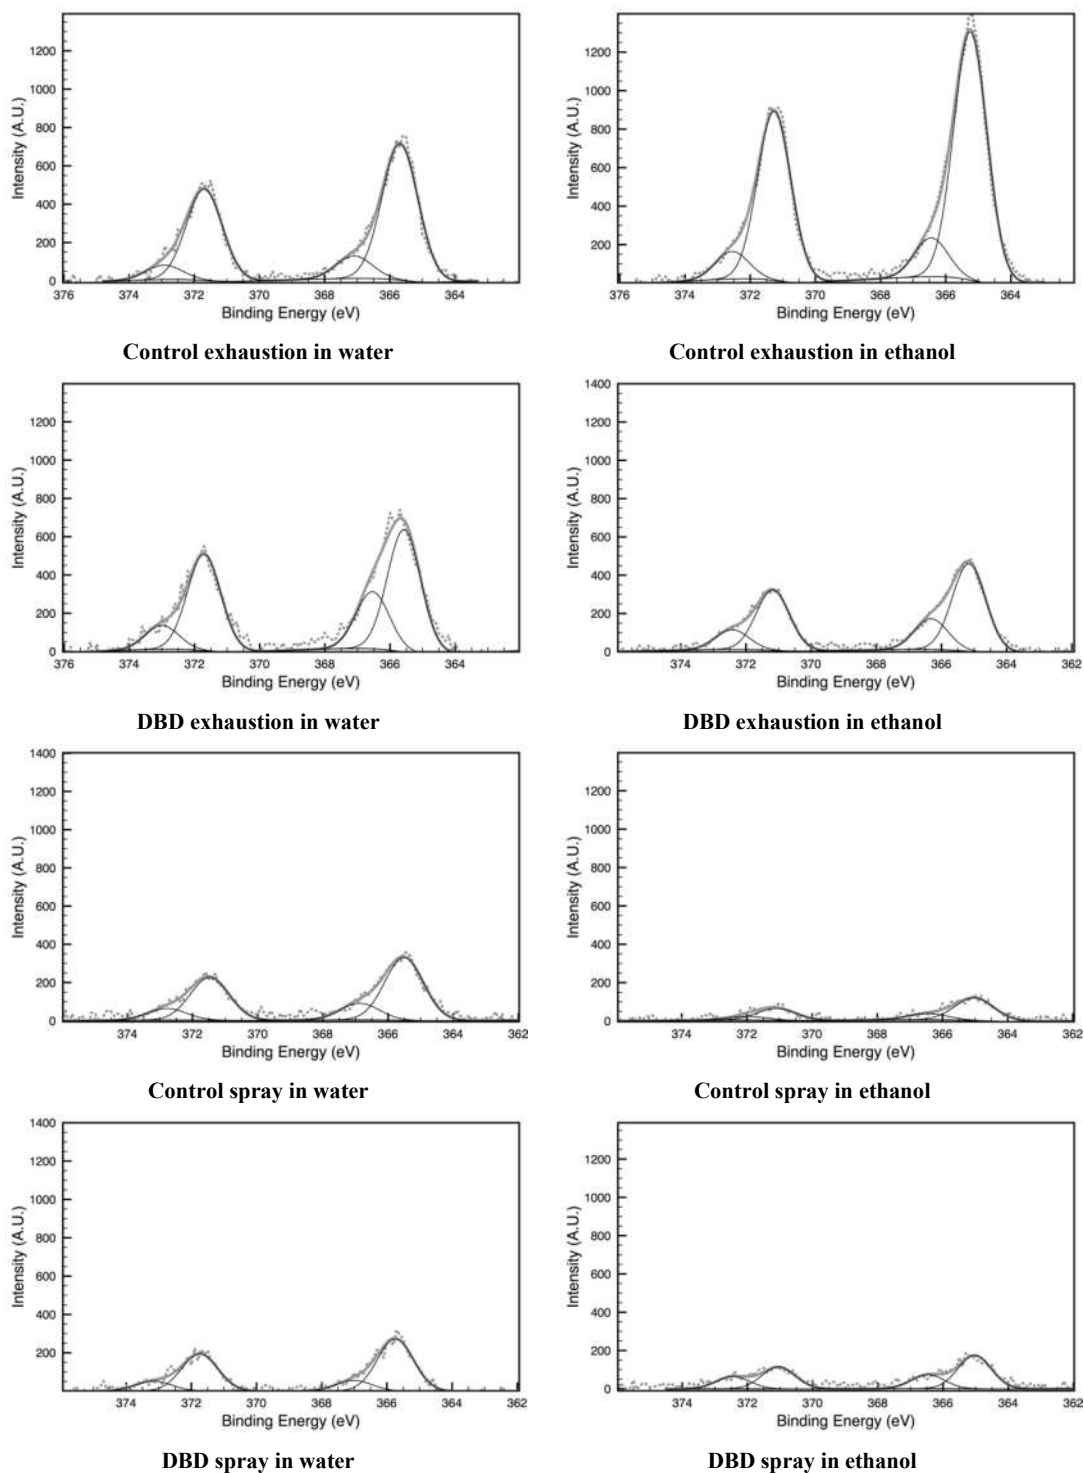

**Figure S4.** - High-resolution deconvoluted XPS spectra of the Ag3d binding energy region of untreated and DBD plasma-treated PA66 samples with PVP-AgNPs in water (W) and ethanol (E) dispersions deposited by spray (Sp) and exhaustion (Ex) methods.

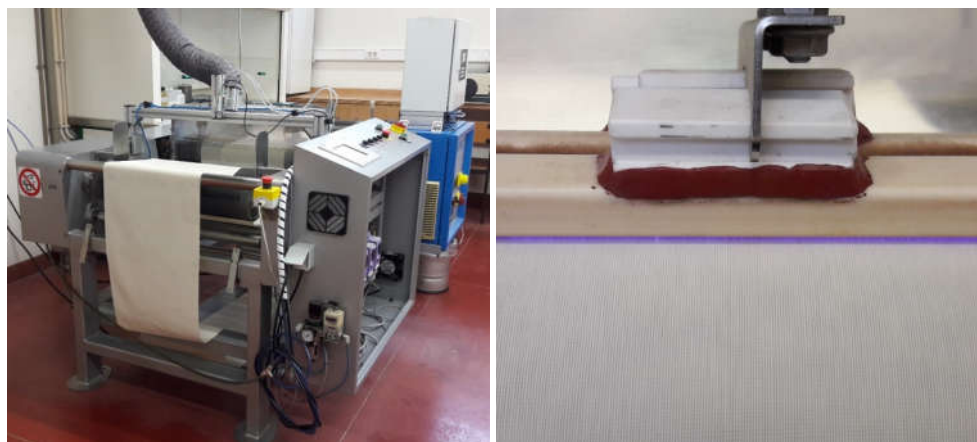

**Figure S5.** - DBD plasma semi-industrial prototype machine (Softal GmbH/University of Minho, Guimarães, Portugal).
